# Developmental Alcohol Exposure in *Drosophila*: Effects on Adult Phenotypes and Gene Expression in the Brain

Sneha S. Mokashi, Vijay Shankar, Rebecca A. MacPherson, Rachel C. Hannah, Trudy F. C. Mackay and Robert R. H. Anholt\*

Department of Genetics and Biochemistry and Center for Human Genetics,  
Clemson University, Greenwood, SC29646, USA

\* corresponding author, email: [ranholt@clemson.edu](mailto:ranholt@clemson.edu)

Fetal alcohol exposure can lead to developmental abnormalities, intellectual disability, and behavioral changes, collectively termed fetal alcohol spectrum disorder (FASD). In 2015, the Centers for Disease Control found that 1 in 10 pregnant women report alcohol use and more than 3 million women in the USA are at risk of exposing their developing baby to alcohol. *Drosophila melanogaster* is an excellent genetic model to study developmental effects of alcohol exposure because many individuals of the same genotype can be reared rapidly and economically under controlled environmental conditions. Flies exposed to alcohol undergo physiological and behavioral changes that resemble human alcohol-related phenotypes. Here, we show that adult flies that developed on ethanol-supplemented medium have decreased viability, reduced sensitivity to ethanol, and disrupted sleep and activity patterns. To assess the effects of exposure to alcohol during development on brain gene expression, we performed single cell RNA sequencing and resolved cell clusters with differentially expressed genes which represent distinct neuronal and glial populations. Differential gene expression showed extensive sexual dimorphism with little overlap between males and females. Gene expression differences following developmental alcohol exposure were similar to previously reported differential gene expression following cocaine consumption, suggesting that common neural substrates respond to both drugs. Genes associated with glutathione metabolism, lipid transport, glutamate and GABA metabolism, and vision feature in sexually dimorphic global multi-cluster interaction networks. Our results provide a blueprint for translational studies on alcohol-induced effects on gene expression in the brain that may contribute to or result from FASD in human populations.

Keywords: behavioral genetics, single cell RNA sequencing, transcriptomics, model organism, Fetal Alcohol Spectrum Disorder, interaction networks

## 36 Introduction

37  
38 Prenatal exposure to ethanol can trigger a wide range of adverse physiological, behavioral, and  
39 cognitive outcomes, collectively termed fetal alcohol spectrum disorder (FASD) (1-4). Fetal  
40 alcohol syndrome (FAS) has the most severe manifestations of all FASDs, including craniofacial  
41 dysmorphologies, neurocognitive deficiencies, and behavioral disorders such as hyperactivity,  
42 attention deficit disorder and motor coordination anomalies (1,5-7). FAS/FASD is the most  
43 common preventable pediatric disorder, often diagnostically confounded with autism spectrum  
44 disorder (8). Time, dose, and frequency of exposure are often unknown, and manifestations of  
45 FASD are diverse and become evident long after exposure. The Centers for Disease Control  
46 and Prevention found that 1 in 10 pregnant women report alcohol use and more than 3 million  
47 women in the USA are at risk of exposing their developing baby to alcohol, despite warning  
48 labels on alcoholic beverages that indicate possible effects on prenatal development (9).  
49 Adverse consequences of fetal alcohol exposure extend throughout the lifespan.

50  
51 Determining the effects of developmental alcohol exposure on adult phenotypes and gene  
52 expression in the adult brain is challenging in human populations, but can be addressed in  
53 model organisms. *Drosophila melanogaster* is an excellent model to study developmental  
54 effects of alcohol exposure, as we can control the genetic background and environmental  
55 conditions for large numbers of individuals without regulatory restrictions and at low cost.  
56 Importantly, flies exposed to alcohol experience loss of postural control, sedation, and  
57 development of tolerance (10-13), resembling human alcohol intoxication. Previous studies on  
58 the effects of developmental alcohol exposure in *Drosophila* showed reduced viability and  
59 delayed development time (14,15), reduced adult body size (14) and disruption of neural  
60 development (16). Developmental exposure to alcohol was associated with reduction in the  
61 expression of a subset of insulin-like peptides and the insulin receptor (14), dysregulation of lipid  
62 metabolism and concomitant increased oxidative stress (17), and reduced larval food intake due  
63 to altered neuropeptide F signaling (18).

64  
65 Here, we show that developmental alcohol exposure in *Drosophila* results in decreased viability,  
66 reduced sensitivity to ethanol and disrupted sleep and activity patterns. Single cell RNA  
67 sequencing on adult fly brains following developmental alcohol exposure shows widespread  
68 sexually dimorphic changes in gene expression. These changes in gene expression resemble  
69 changes observed previously following cocaine exposure (19), indicating common neuronal and  
70 glial elements that respond to alcohol and cocaine consumption.

## 71 72 Materials and Methods

### 73 74 *Drosophila* Stocks and Exposure to Ethanol

75  
76 *D. melanogaster* of the wild type Canton S (B) strain were maintained on  
77 cornmeal/yeast/molasses-agar medium supplemented with yeast at 25°C on a 12h light:dark  
78 cycle with 50% humidity, in controlled adult density vials to prevent overcrowding. We allowed 5  
79 males and 5 females to mate for two days and aged their progeny for 3-5 days after eclosion.  
80 We then placed 50 males and 50 females into large egg collection cages on grape juice agar  
81 and yeast paste. We acclimatized the flies to the cages for 24 hours with grape juice plate  
82 changes every 12 hours, and collected up to 12-hour old eggs with a blunt metal needle. We  
83 placed the eggs on cornmeal-agar-molasses medium (control) or on cornmeal-agar-molasses  
84 medium containing 10% (v/v) ethanol (ethanol) without yeast. We collected 50 eggs per vial and  
85 set up 10-15 vials per condition per collection week over a 48-hour period (Figure 1). After

86 eclosion, flies were transferred to control medium without yeast and aged as indicated for the  
87 relevant experiments. Unless otherwise indicated, all behavioral assays were performed in a  
88 controlled environment at 25°C.

89

## 90 Viability

91

92 The number of flies that emerged from vials into which 50 eggs had been placed were counted  
93 and the data were analyzed using the “PROC GLM” command (Type III) in SAS v3.8 (Cary, NC)  
94 according to the model  $Y = \mu + T + \varepsilon$ , where  $Y$  is the number of eclosed flies,  $\mu$  is the population  
95 mean,  $T$  is the fixed effect of treatment (flies reared on control or ethanol medium), and  $\varepsilon$  is the  
96 residual error.

97

## 98 Ethanol sensitivity

99

100 We measured ethanol sedation time as described previously (20) on 44-48 3-5 day old flies per  
101 sex per treatment. Ethanol sedation time was assessed between 8:30am and 11:30am. The  
102 number of seconds required for flies to lose postural control was analyzed using the “PROC  
103 GLM” command (Type III) in SAS v3.8 according to the model  $Y = \mu + T + S + TxS + \varepsilon$ , where  $Y$   
104 is the time to sedation,  $\mu$  is the population mean,  $T$  is the fixed effect of treatment (control or  
105 ethanol medium),  $S$  is the fixed effect of sex, and  $\varepsilon$  is the residual error.

106

## 107 Sleep and Activity

108

109 Flies reared on either control or ethanol medium were placed in Drosophila Activity Monitors  
110 (DAM) (TriKinetics, Waltham, MA) containing a 5% sucrose, 2% agar medium at 1-2 days of  
111 age, and monitored for seven days on a 12 hour light-dark cycle. Activity was recorded as  
112 counts every time the fly interrupts an infrared beam. Sleep was defined as at least five minutes  
113 of inactivity. Only data from flies that survived the entire testing period were included, resulting  
114 in 57-64 flies per sex per treatment for analysis. Raw DAM monitor data were run in ShinyR-  
115 DAM (21), and the outputs were downloaded and parsed according to phenotype (e.g.  
116 day/night, sleep/activity, bout length/bout count) for subsequent statistical analyses. The data  
117 were analyzed using the “PROC MIXED” command (Type III) in SAS v3.8 according to the  
118 model  $Y = \mu + T + S + TxS + Rep(TxS) + \varepsilon$ , where  $Y$  is the sleep or activity phenotype,  $\mu$  is the  
119 population mean,  $T$  is the fixed effect of treatment (control or ethanol medium),  $S$  is the fixed  
120 effect of sex,  $Rep$  is the random effect of replicate and  $\varepsilon$  is the residual error. Reduced models  
121 were also performed for each sex.

122

## 123 Brain Dissociation and Single Cell RNA Sequencing

124

125 For single cell RNA sequencing, we collected duplicate samples of 20 brains for each sex from  
126 flies reared on control or ethanol medium. We dissociated the brains as previously described  
127 after incubation with 450µl of collagenase solution (50 ul of fresh 25mg/ml collagenase (Gibco)  
128 in sterile water + 400µl of Schneider’s medium) for 30 minutes followed by stepwise trituration -  
129 P200 pipette 5 times, 23G needle pre-wetted with PBS + BSA 5 times, and 27G pre-wetted  
130 needle 5 times (19). The resulting suspension was passed through a pre-wetted 10µm strainer  
131 (Celltrics, Görlitz, Germany) with gentle tapping. We counted live cells using a hemocytometer  
132 with trypan blue exclusion and proceeded with GEM generation using the Chromium controller  
133 (10X Genomics, Pleasanton, CA) for samples with > 500 live cells/µl. We prepared libraries in  
134 accordance with 10X Genomics v3.1 protocols. We determined fragment sizes using Agilent  
135 TapeStation kits (Agilent, Santa Clara, CA) - d5000 for amplified cDNA and d1000 for libraries.

136 We measured the concentrations of amplified cDNA and final libraries using a Qubit 1X dsDNA  
137 HS kit (Invitrogen, Waltham, MA) and a qPCR based library quantification kit (KAPA  
138 Biosystems, Roche, Basel, Switzerland). We used 12 cycles for the cDNA amplification and 12  
139 cycles for indexing PCR. We sequenced the final libraries on an Illumina NovaSeq6000.

140

## 141 Single Cell RNA Sequencing Data Analysis and Bioinformatics

142

143 We used the *mkfastq* pipeline within Cell Ranger v3.1 (10X Genomics, Pleasanton, CA) to  
144 convert BCL files from the sequence run folder to demultiplexed FASTQ files. We used the  
145 *mkref* pipeline to index the release 6 version of the *D. melanogaster* reference  
146 *GCA\_000001215.4* from NCBI Genbank. For alignment, we used the *count* pipeline within Cell  
147 Ranger v3.1 with the expected cell count parameter set to 5,000 cells. We imported raw  
148 expression counts output for each sample from the Cell Ranger pipeline and analyzed these  
149 data using the Seurat v3 package in R (22). We normalized counts by regularized negative  
150 binomial regression using the *scTransform* pipeline (23). We performed integration of samples  
151 using the SCT method. *RunUMAP* and *FindNeighbors* functions were used with 10 dimensions  
152 to ordinate expression space and reduce data dimensionality. To identify cell-type clusters, we  
153 used unsupervised clustering using the *FindClusters* function and assigned the origin of  
154 clustered cells based on well-established biomarkers.

155

156 We used the Pearson residuals output from the *scTransform* pipeline as input for differential  
157 expression calculation (23). We used the *MAST* algorithm as the testing methodology in the  
158 *FindMarkers* function for each cluster to calculate differential expression, which allows for the  
159 incorporation of the cellular detection rate, defined as a fraction of genes expressed in each cell,  
160 as a covariate (24). *P*-values for differential expression were adjusted for multiple-hypothesis  
161 testing using a Bonferroni correction, and adjusted *p*-values that are less than 0.05 were  
162 considered statistically significant.

163

164 Interaction networks were produced using the unique list of differentially expressed genes  
165 aggregated from all clusters and the stringApp (25) within Cytoscape (26).

166

167 The code for all analyses can be found here: [https://github.com/vshanka23/The-Drosophila-  
168 Brain-after-developmental-ethanol-exposure-at-Single-Cell-  
169 Resolution/blob/main/Rcode\\_for\\_analysis.R](https://github.com/vshanka23/The-Drosophila-Brain-after-developmental-ethanol-exposure-at-Single-Cell-Resolution/blob/main/Rcode_for_analysis.R)

170

## 171 Results

172

### 173 Effects of Developmental Alcohol Exposure on Adult Phenotypes

174

175 Exposure of flies to ethanol during the embryonic and larval stages resulted in an 8.9%  
176 reduction in viability compared to flies reared on control medium (Figure 2A). The adult flies  
177 exposed to ethanol during development did not show any overt morphological abnormalities.  
178 We next asked whether developmental alcohol exposure would alter sensitivity to acute alcohol  
179 exposure as adults. We reared developing flies on ethanol medium and transferred the adults to  
180 control medium immediately after eclosion. The flies that developed on ethanol medium showed  
181 reduced sensitivity (longer sedation times) to acute alcohol exposure in both sexes, indicating  
182 increased tolerance to acute alcohol exposure compared to flies that developed on control  
183 medium (Figure 2B).

184

185 Children with FASD often have disturbed sleep (27, 28). Therefore, we used the Drosophila  
186 Activity Monitor system to assess the effects of developmental alcohol exposure on adult activity  
187 and sleep patterns, and found that exposure to alcohol during development had sex-specific  
188 effects on these phenotypes. Overall activity in males was not affected by the ethanol treatment,  
189 but females exposed to ethanol were more active (Figure 2C; Supplementary Table S1).  
190 Ethanol exposure reduced sleep during the day in both sexes (Figure 2D), and day sleep in  
191 males was fragmented, with an increase in activity bouts (Figure 2E). In contrast, females  
192 compensated for increased activity and reduced daytime sleep with extended periods of night  
193 sleep (Figure 2F) with a reduced number of activity bouts (Figure 2G; Supplementary Table S1).

194

## 195 Effects of Developmental Alcohol Exposure on Gene Expression in the Brain

196

197 We performed single cell RNA sequencing to assess the effects of developmental alcohol  
198 exposure on gene expression in the brain in males and females, with two replicates per sex and  
199 treatment (Figure 1). We obtained a total of 108,571 cells across all samples, which  
200 corresponds to ~10% of all cells in a Drosophila brain (Supplementary Table S2). We visualized  
201 these data using the Uniform Manifold Approximation and Projection (UMAP) non-linear  
202 dimensionality reduction method (29), which showed that all samples were uniformly  
203 represented (Figure 3; Supplementary Table S2). Unsupervised clustering of the dataset  
204 generated 43 cell clusters, which represent the major regions of the Drosophila brain, including  
205 neuronal and glial populations, and all major neurotransmitter cell types (Figure 4;  
206 Supplementary Table S3). We identified seven distinct populations of GABAergic neurons, two  
207 subpopulations of Kenyon cells of the mushroom bodies (integrative centers for experience-  
208 dependent modulation of behavior), and several distinct populations of glia, including two  
209 separate clusters of astrocytes as well as surface glia that form the blood-brain barrier (Figure  
210 4).

211

212 We combined all differentially expressed genes from all clusters and performed differential  
213 expression analyses. We found 119 transcripts in males and 148 transcripts in females with  
214 altered abundances after developmental alcohol exposure at a Bonferroni adjusted  $p$ -value  
215  $< 0.05$ . We identified 61 upregulated and 25 downregulated genes in males, and 57 upregulated  
216 and 34 downregulated genes in females at a threshold of  $|\log_2FC| > 0.25$  (Figure 5;  
217 Supplementary Tables S4 and S5). Increasing the stringency to  $|\log_2FC| > 1.0$  (Bonferroni  
218 adjusted  $p$  value  $< 0.05$ ) retained 36 upregulated and 10 downregulated genes in males and 32  
219 upregulated and 20 downregulated genes in females (Supplementary Figure S1). Differential  
220 expression patterns are sexually dimorphic, as observed previously for cocaine-induced  
221 modulation of gene expression (19), with only 32 differentially expressed genes in common  
222 between the sexes. Changes in gene expression in the mushroom bodies, represented by  
223 cluster C12, are primarily observed in females. Developmental alcohol exposure modulates  
224 expression of several genes in glia, represented by clusters C5, C15, C23, C24, and C33, in a  
225 sexually dimorphic pattern (Figure 5). Especially noteworthy is the prominent differential  
226 expression of *lncRNA:CR31451*, a long non-coding RNA of unknown function, in multiple  
227 neuronal populations. This transcript is globally upregulated in males but downregulated in  
228 females (Figure 5; Supplementary Figure S1). Among all differentially expressed genes, ~ 58%  
229 have human orthologs (DIOPT score  $\geq 3$ ; Supplementary Table S6).

230

231 We assessed global interaction networks of differentially expressed gene products across all  
232 cell clusters for males and females separately (Figure 6). The male interaction network is  
233 composed of modules associated with glutathione metabolism, lipid transport, glutamate and  
234 GABA metabolism, and vision (Figure 6A). The female interaction network also contains

235 modules associated with glutamate and GABA metabolism, lipid metabolism, and vision, but the  
236 composition of these modules is distinct from their male counterparts. In addition, the female  
237 network features modules associated with monoaminergic signaling, cell adhesion, and Wnt  
238 signaling (Figure 6B). Multiple cell clusters contribute to each network module, indicating that  
239 modulation of gene regulation by developmental alcohol exposure is coordinated across  
240 different cells throughout the brain.

241  
242 We noticed that many genes that are differentially expressed following developmental exposure  
243 to ethanol correspond to genes that undergo altered expression when flies are exposed to  
244 cocaine (19). However, the transcriptional response to acute exposure to cocaine is larger than  
245 the transcriptional response to developmental alcohol exposure. Nonetheless, 69.7% of  
246 differentially expressed genes in males and 43.2% of differentially expressed genes in females  
247 in our data overlap with differentially expressed genes after consumption of cocaine (Figure 7;  
248 Supplementary Table S7), although the magnitude and direction of differential expression of  
249 common genes between the two treatments varies by cell type (Supplementary Table S8).  
250 Gene ontology enrichment analyses of this common set of genes in each sex highlights gene  
251 ontology categories associated with development and function of the nervous system  
252 (Supplementary Table S9, 30).

## 253 254 **Discussion**

255  
256 We characterized the consequences of developmental alcohol exposure in *Drosophila* on  
257 viability, behavioral phenotypes, and gene expression in the brain. Characteristic features of  
258 FASD in humans include craniofacial dysmorphologies and cognitive impairments. Although we  
259 did not perform detailed morphometric measurements, we did not observe any overt  
260 morphological aberrations, and cognitive impairments are challenging to assess in *Drosophila*.  
261 Nevertheless, flies exposed to alcohol during embryonic and larval development showed  
262 changes in activity and sleep patterns (Figure 2C-G), reminiscent of activity and sleep  
263 disturbances seen in children with FASD (27, 28). We also find that growth on alcohol  
264 supplemented medium results in reduced ethanol sensitivity of adult flies, in agreement with a  
265 previous study (Figure 2B, 14).

266  
267 We hypothesize that the effects of developmental alcohol exposure on changes in gene  
268 expression in the *Drosophila* central nervous system will converge on evolutionarily conserved  
269 cellular processes. *Drosophila* is advantageous for studies on gene expression at single cell  
270 resolution because we can survey the entire brain in a single analysis, unlike studies in rodents,  
271 and pooling multiple brains of the same genotype averages individual variation. The power to  
272 detect changes in gene expression in our study is improved by only considering changes in  
273 gene expression that are consistent across replicates.

274  
275 We observed changes in gene expression in adult flies, even though exposure to alcohol  
276 occurred only during the larval stages and briefly after eclosion, after which adults were  
277 collected and maintained on regular medium without alcohol. It is possible that developmental  
278 alcohol exposure may result in epigenetic modifications that give rise to altered gene expression  
279 patterns into adulthood (31).

280  
281 We observe changes in gene expression in diverse neuronal and glial cell populations (Figure  
282 5). Since we are not able to sample all cells of the brain, it is likely that some neuronal or glial  
283 cell populations are not represented in our data. However, the major regions of the *Drosophila*  
284 brain and all major neurotransmitter cell types are represented (Figure 4; Supplementary Table  
285 S3). The effects of developmental alcohol exposure are sexually dimorphic, similar to previously

286 observed changes in transcript abundances following consumption of cocaine (19). Sexual  
287 dimorphism is also a hallmark of FASD, with different effects of fetal alcohol exposure on neural  
288 development and cognitive abilities between males and females (32-35). Although different  
289 genes are affected in males and females, gene ontology analysis indicates that they converge  
290 on the same biological processes, related to development and function of the nervous system  
291 (Table S8). The considerable overlap between differentially expressed genes in response to  
292 alcohol and cocaine suggests common neural substrates that respond to toxic exposures.  
293 Genes associated with immune defense and xenobiotic detoxification, including the glutathione  
294 pathway, feature in interaction networks of differentially expressed gene products (Figure 6).

295  
296 *lncRNA:CR31451* shows large sexually antagonistic responses to developmental alcohol  
297 exposure in many neuronal cell populations. Whereas a previous study documented expression  
298 of this gene in glia (36), we only observe differential gene expression of *lncRNA:CR31451* in  
299 neurons under the conditions of our study (Figure 5). Future studies are needed to assess  
300 whether this gene product fulfills a regulatory function that affects multiple neurotransmitter  
301 signaling processes and whether its sex-antagonistic response to alcohol exposure could in part  
302 cause the differential gene expression patterns seen in males and females.

303  
304 Our observations of extensive changes in gene expression in glia in response to developmental  
305 alcohol exposure are in accordance with the role of glia in FASD. Fetal alcohol exposure leads  
306 to impaired astrocyte development and differentiation, which gives rise to microencephaly (37,  
307 38). In addition, ethanol exposure increases permeability of the blood brain barrier (39), which in  
308 *Drosophila* is formed by the surface glia (40). Among the glial genes that show altered  
309 expression after developmental alcohol exposure in *Drosophila* are *GILT1*, which contributes to  
310 the immune defense response to bacteria (41), *Gs2* and *Eaat1*, which are involved in glutamine  
311 synthesis and transport of glutamate in astrocytes (42, 43), *GstE12* and *se*, which are involved  
312 in glutathione metabolism (44), and *fabp* and *apolpp*, which function in lipid metabolism (45, 46).

313  
314 GABA signaling and glutamate signaling neuronal cell populations feature prominently in our  
315 data (Figure 3). Glutamate is also a precursor for the biosynthesis of glutathione, which is  
316 produced in glia and protects against oxidative stress and detoxification of xenobiotics (47).  
317 Developmental alcohol exposure interferes with glutamate and GABA signaling because ethanol  
318 is both an antagonist to the NMDA glutamate receptor and mimics GABA (48). Consequently,  
319 fetal alcohol exposure results in neuronal apoptosis during the rapid brain growth spurt during  
320 which the astrocytes play a major role (48, 49). Evolutionarily conserved neural processes that  
321 respond to developmental alcohol exposure in *Drosophila* thus provide a blueprint for  
322 translational studies on alcohol-induced effects on gene expression in the brain that may  
323 contribute to or result from FASD in human populations.

## 324 325 **Data Availability Statement**

326  
327 The datasets for this study can be found in the GEO repository under accession number  
328 GSE172231.

## 329 330 **Author Contributions**

331  
332 SSM and VS contributed equally; SSM and RCH maintained fly stocks, reared flies on  
333 developmental alcohol, and measured viability; RAM measured and analyzed ethanol sensitivity  
334 and sleep and activity phenotypes; SSM and RCH performed brain dissociation; SSM  
335 performed RNA sequencing; SSM and VS analyzed the RNA sequencing data; SSM, TFCM

336 and RRHA conceived of the experiments; SSM, VS, RAM, TFCM and RRHA wrote the  
337 manuscript; TFCM and RRHA provided resources.

338  
339  
340

## 341 **Funding**

342  
343 This work was supported by grants GM128974 and DA041613 from the National Institutes of  
344 Health to TFCM and RRHA. The funding sources were not involved in the study design;  
345 collection, analysis, or interpretation of data; writing of the report, or decision to submit the  
346 article for publication.

347  
348

## 348 **Conflict of Interest**

349  
350 The authors declare that the research was conducted in the absence of any commercial or  
351 financial relationships that could be construed as a potential conflict of interest.

352  
353

## 353 **References**

- 354  
355 1. Jones K, Smith D. Recognition of the fetal alcohol syndrome in early infancy. *The Lancet*  
356 (1973) 302: 999-1001. doi: 10.1016/s0140-6736(73)91092-1.  
357  
358 2. Hoyme HE, May PA, Kalberg WO, Kodituwakku P, Gossage JP, Trujillo PM, et al. A  
359 practical clinical approach to diagnosis of fetal alcohol spectrum disorders: clarification of  
360 the 1996 Institute of Medicine criteria. *Pediatrics* (2005) 115: 39-47. doi:  
361 10.1542/peds.2004-0259.  
362  
363 3. Roozen S, Peters GJ, Kok G, Townend D, Nijhuis J, Curfs L. Worldwide prevalence of  
364 Fetal Alcohol Spectrum Disorders: A systematic literature review including meta-  
365 analysis. *Alcohol Clin Exp Res.* (2016) 40:18-32. doi: 10.1111/acer.12939.  
366  
367 4. Kaminen-Ahola N. Fetal alcohol spectrum disorders: genetic and epigenetic  
368 mechanisms. *Prenat Diagn.* (2020) 40: 1185-92. doi: 10.1002/pd.5731.  
369  
370 5. Clarren SK, Smith DW. The fetal alcohol syndrome. *Lamp.* (1978) 35: 4-7.  
371  
372 6. Pulsifer MB. The neuropsychology of mental retardation. *J Int Neuropsychol Soc.* (1996)  
373 2: 159-76. doi: 10.1017/s1355617700001016.  
374  
375 7. Eckardt MJ, File SE, Gessa GL, Grant KA, Guerri C, Hoffman PL, et al. Effects of  
376 moderate alcohol consumption on the central nervous system. *Alcohol Clin Exp Res.*  
377 (1998) 22: 998-1040. doi: 10.1111/j.1530-0277.1998.tb03695.x.  
378  
379 8. Lange S, Rehm J, Anagnostou E, Popova S. Prevalence of externalizing disorders and  
380 Autism Spectrum Disorders among children with Fetal Alcohol Spectrum Disorder:  
381 systematic review and meta-analysis. *Biochem Cell Biol.* (2018) 96: 241-51. doi:  
382 10.1139/bcb-2017-0014.



- 383 9. Tan CH, Denny CH, Cheal, NE, Sniezek JE, Kanny D. Alcohol use and binge drinking  
384 among women of childbearing age - United States, 2011-2013. *MMWR*. (2015) 64:  
385 1042-6. doi: 10.15585/mmwr.mm6437a3.  
386
- 387 10. Morozova TV, Goldman D, Mackay TFC, Anholt RRH. The genetic basis of alcoholism:  
388 multiple phenotypes, many genes, complex networks. *Genome Biol.* (2012) 13: 239. doi:  
389 10.1186/gb-2012-13-2-239.  
390
- 391 11. Morozova TV, Mackay TFC, Anholt RRH. Genetics and genomics of alcohol sensitivity.  
392 *Mol Genet Genomics* (2014) 289: 253-69. doi: 10.1007/s00438-013-0808-y.  
393
- 394 12. Scholz H. Unraveling the mechanisms of behaviors associated with AUDs using flies  
395 and worms. *Alcohol Clin Exp Res.* (2019) 43: 2274-84. doi: 10.1111/acer.14199.  
396
- 397 13. Petruccelli E, Kaun KR. Insights from intoxicated *Drosophila*. *Alcohol* (2019) 74: 21-7.  
398 doi: 10.1016/j.alcohol.2018.03.004.  
399
- 400 14. McClure KD, French RL, Heberlein U. A *Drosophila* model for fetal alcohol syndrome  
401 disorders: role for the insulin pathway. *Dis Model Mech.* (2011) 4: 335-46. doi:  
402 10.1242/dmm.006411.  
403
- 404 15. Morozova TV, Hussain Y, McCoy LJ, Zhirnov EV, Davis MR, Pray VA, et al. A *Cyclin E*  
405 centered genetic network contributes to alcohol-induced variation in *Drosophila*  
406 development. *G3 (Bethesda)* (2018) 8: 2643-53. doi: 10.1534/g3.118.200260.  
407
- 408 16. Scepanovic G, Stewart BA. Analysis of *Drosophila* nervous system development  
409 following an early, brief exposure to ethanol. *Dev Neurobiol.* (2019) 79: 780-93. doi:  
410 10.1002/dneu.22718.  
411
- 412 17. Logan-Garbisch T, Bortolazzo A, Luu P, Ford A, Do D, Khodabakhshi P, et al.  
413 Developmental ethanol exposure leads to dysregulation of lipid metabolism and  
414 oxidative stress in *Drosophila*. *G3 (Bethesda)* (2014) 5: 49-59. doi:  
415 10.1534/g3.114.015040.  
416
- 417 18. Guevara A, Gates H, Urbina B, French R. Developmental ethanol exposure causes  
418 reduced feeding and reveals a critical role for Neuropeptide F in survival. *Front Physiol.*  
419 (2018) 9: 237. doi: 10.3389/fphys.2018.00237.  
420
- 421 19. Baker BM, Mokashi SS, Shankar V, Hatfield JS, Hannah RC, Mackay TFC, et al. The  
422 *Drosophila* brain on cocaine at single cell resolution. *Genome Res.* (2021) Epub Ahead  
423 of print. doi: 10.1101/gr.268037.120.  
424
- 425 20. Sass TN, MacPherson RA, Mackay TFC, Anholt RRH. A high-throughput method for  
426 measuring alcohol sedation time of individual *Drosophila melanogaster*. *J Vis Exp.*  
427 (2020) 158: e61108. doi: 10.3791/61108.  
428
- 429 21. Cichewicz K, Hirsh J. ShinyR-DAM: A program analyzing *Drosophila* activity, sleep and  
430 circadian rhythms. *Commun Biol.* (2018) 1:1-5. doi:10.1038/s42003-018-0031-9.  
431

- 432 22. Butler A, Hoffman P, Smibert P, Papalexi E, Satija R. Integrating single-cell  
433 transcriptomic data across different conditions, technologies, and species. *Nat*  
434 *Biotechnol.* (2018) 36: 411-20. doi: 10.1038/nbt.4096.
- 435 23. Hafemeister C, Satija R. Normalization and variance stabilization of single-cell RNA-seq  
436 data using regularized negative binomial regression. *Genome Biol.* (2019) 20: 296. doi:  
437 10.1186/s13059-019-1874-1.  
438
- 439 24. Finak G, McDavid A, Yajima M, Deng J, Gersuk V, Shalek AK, et al. MAST: a flexible  
440 statistical framework for assessing transcriptional changes and characterizing  
441 heterogeneity in single-cell RNA sequencing data. *Genome Biol.* (2015)16: 278. doi:  
442 10.1186/s13059-015-0844-5.
- 443 25. Doncheva NT, Morris J, Gorodkin J, Jensen LJ. Cytoscape stringApp: Network analysis  
444 and visualization of proteomics data. *J Proteome Res.* (2018) 18: 623-32. doi:  
445 10.1021/acs.jproteome.8b00702.
- 446 26. Shannon P, Markiel A, Ozier O, Baliga NS, Wang JT, Ramage D, et al. Cytoscape: a  
447 software environment for integrated models of biomolecular interaction networks.  
448 *Genome Res.* (2003) 13: 2498-504. doi: 10.1101/gr.1239303.
- 449 27. Hanlon-Dearman A, Chen ML, Olson HC. Understanding and managing sleep disruption  
450 in children with fetal alcohol spectrum disorder. *Biochem Cell Biol.* (2018) 96: 267-74.  
451 doi: 10.1139/bcb-2017-0064.
- 452 28. Kamara D, Beauchaine TP. A review of sleep disturbances among infants and children  
453 with neurodevelopmental disorders. *Rev J Autism Dev Disord.* (2020) 7: 278-94. doi:  
454 10.1007/s40489-019-00193-8.
- 455 29. Becht E, McInnes L, Healy J, Dutertre C, Kwok IWH, Ng LG, et al. Dimensionality  
456 reduction for visualizing single-cell data using UMAP. *Nat Biotechnol.* (2019) 37: 38-44.  
457 doi:10.1038/nbt.4314
- 458 30. Thomas PD, Campbell MJ, Kejariwal A, Mi H, Karlak B, Daverman R, et al. PANTHER:  
459 a library of protein families and subfamilies indexed by function. *Genome Res.* (2003)  
460 13: 2129-41. doi: 10.1101/gr.772403.
- 461 31. Kobor MS, Weinberg J. Focus on: epigenetics and fetal alcohol spectrum  
462 disorders. *Alcohol Res Health* (2011) 34: 29-37.  
463
- 464 32. May PA, Tabachnick B, Hasken JM, Marais AS, de Vries MM, Barnard R, et al. Who is  
465 most affected by prenatal alcohol exposure: Boys or girls? *Drug Alcohol Depend.* (2017)  
466 177: 258-67. doi: 10.1016/j.drugalcdep.2017.04.010.  
467
- 468 33. Coleman LG Jr, Oguz I, Lee J, Styner M, Crews FT. Postnatal day 7 ethanol treatment  
469 causes persistent reductions in adult mouse brain volume and cortical neurons with sex  
470 specific effects on neurogenesis. *Alcohol* (2012) 46: 603-12. doi:  
471 10.1016/j.alcohol.2012.01.003.  
472
- 473 34. Weinberg J, Sliwowska JH, Lan N, Hellems KG. Prenatal alcohol exposure: foetal  
474 programming, the hypothalamic-pituitary-adrenal axis and sex differences in outcome. *J*  
475 *Neuroendocrinol.* (2008) 20:470-88. doi: 10.1111/j.1365-2826.2008.01669.x.  
476

- 477 35. Kelly SJ, Leggett DC, Cronise K. Sexually dimorphic effects of alcohol exposure during  
478 development on the processing of social cues. *Alcohol Alcohol.* (2009) 44: 555-60. doi:  
479 10.1093/alcalc/agn061.  
480
- 481 36. Davie K, Janssens J, Koldere D, De Waegeneer M, Pech U, Kreft Ł, et al. A single-cell  
482 transcriptome atlas of the aging *Drosophila* brain. *Cell* (2018) 174: 982-98.e20.  
483 doi:10.1016/j.cell.2018.05.057  
484
- 485 37. Wilhelm CJ, Guizzetti M. Fetal Alcohol Spectrum Disorders: An overview from the glia  
486 perspective. *Front Integr Neurosci.* (2016) doi: 10.3389/fnint.2015.00065.  
487
- 488 38. Guerri C, Pascual M, Renau-Piqueras J. Glia and fetal alcohol syndrome. *Neurotoxicol.*  
489 (2001) 22: 593-9. doi: 10.1016/s0161-813x(01)00037-7  
490
- 491 39. Tufa U, Ringuette D, Wang XF, Levi O, Carlen P. Two-photon microscopy imaging of  
492 blood brain barrier leakage in fetal alcohol disorder mice. *Optics in the Life Sciences*  
493 *Congress, OSA Technical Digest (online) (Optical Society of America)* (2017) paper  
494 JTU4A.9.  
495
- 496 40. DeSalvo MK, Hindle SJ, Rusan ZM, Orng S, Eddison M, Halliwill K, et al. The *Drosophila*  
497 surface glia transcriptome: evolutionary conserved blood-brain barrier processes. *Front*  
498 *Neurosci.* (2014) 8: 346. doi: 10.3389/fnins.2014.00346.  
499
- 500 41. Kongton K, McCall K, Phongdara A. Identification of gamma-interferon-inducible  
501 lysosomal thiol reductase (GILT) homologues in the fruit fly *Drosophila melanogaster*.  
502 *Dev Comp Immunol.* (2014) 44: 389-96. doi: 10.1016/j.dci.2014.01.007.  
503
- 504 42. Parinejad N, Peco E, Ferreira T, Stacey SM, van Meyel DJ. Disruption of an EAAT-  
505 mediated chloride channel in a *Drosophila* model of ataxia. *J Neurosci.* (2016) 36: 7640-  
506 7. doi:10.1523/JNEUROSCI.0197-16.2016  
507
- 508 43. Chen WT, Yang HY, Lin CY, Lee YZ, Ma SC, Chen WC, et al. Structural insight into the  
509 contributions of the N-terminus and key active-site residues to the catalytic efficiency of  
510 glutamine synthetase 2. *Biomolecules* (2020) 10:1671. doi:10.3390/biom10121671  
511
- 512 44. Saisawang C, Wongsantichon J, Ketterman AJ. A preliminary characterization of the  
513 cytosolic glutathione transferase proteome from *Drosophila melanogaster*. *Biochem J.*  
514 (2012) 442:181-90. doi:10.1042/BJ20111747  
515
- 516 45. Palm W, Sampaio JL, Brankatschk M, Carvalho M, Mahmoud A, Shevchenko A, et al,  
517 Lipoproteins in *Drosophila melanogaster* -- assembly, function, and influence on tissue  
518 lipid composition. *PLoS Genet.* (2012) 8: e1002828. doi:10.1371/journal.pgen.1002828  
519
- 520 46. Gerstner JR, Vanderheyden WM, Shaw PJ, Landry CF, Yin JC. Fatty-acid binding  
521 proteins modulate sleep and enhance long-term memory consolidation in  
522 *Drosophila*. *PLoS One* (2011) 6: e15890. doi:10.1371/journal.pone.0015890  
523
- 524 47. Sedlak TW, Paul BD, Parker GM, Hester LD, Snowman AM, Taniguchi Y, et al. The  
525 glutathione cycle shapes synaptic glutamate activity. *Proc. Natl. Acad. Sci. USA.*  
526 (2019) 116: 2701-6. doi:10.1073/pnas.1817885116  
527

- 528 48. Olney JW, Wozniak DF, Jevtovic-Todorovic V, Farber NB, Bittigau P, Ikonomidou C.  
529 Glutamate and GABA receptor dysfunction in the fetal alcohol syndrome. *Neurotox Res.*  
530 (2002) 4: 315-25. doi:10.1080/1029842021000010875  
531
- 532 49. Tsai G, Gastfriend DR, Coyle JT. The glutamatergic basis of human alcoholism. *Am J*  
533 *Psychiatry* (1995) 152: 332-40. Ddoi:10.1176/ajp.152.3.332  
534
- 535 50. Thurmond J, Goodman JL, Strelets VB, Attrill H, Gramates LS, Marygold SJ, et al.  
536 FlyBase 2.0: the next generation. *Nucleic Acids Res.* (2019) 47(D1): D759-65. doi:  
537 10.1093/nar/gky1003  
538

## 539 **Figure Legends**

540

541 **Figure 1. Diagram of the experimental design.**

542

543 **Figure 2. Effects of developmental alcohol exposure on viability and behavioral**  
544 **phenotypes in adult flies.** (A) Boxplots of viability (n=12 reps of 50 embryos per treatment), (B)  
545 Ethanol sensitivity (n=43-49 3-5 day old flies per sex per treatment), (C) Activity, (D) Proportion  
546 of daytime sleep, (E) Activity bouts during the day, (F) Proportion of night time sleep, (G) Activity  
547 bouts during the night. Day hours are from 6am-6pm. Grey boxes indicate flies reared on  
548 medium supplemented with 10% (v/v) ethanol and white boxes indicate control flies grown on  
549 regular medium. n=57-64 flies per sex per treatment for all sleep and activity phenotypes. \*  
550  $p < 0.05$ , \*\*  $p < 0.01$ , \*\*\*  $p < 0.001$ .  
551

552 **Figure 3. Uniformity across samples of single cell transcriptomes.** Gene expression  
553 patterns of single cells (n = 108,571) from all eight samples are represented in low dimensional  
554 space using a graph-based, non-linear dimensionality reduction method (UMAP). Individual dots  
555 represent the transcriptome of each cell and the colors of the dots represent the samples to  
556 which the cells belong.  
557

558 **Figure 4. UMAP visualization and annotation of cell clusters.** Cells were clustered based on  
559 their expression pattern using the unsupervised shared nearest neighbor (SNN) clustering  
560 algorithm. Individual dots represent each cell and the colors of the dots represent the cluster to  
561 which the cells belong. Annotation of cell types from clusters was performed by cross-  
562 referencing cluster-defining genes across FlyBase (50) and published literature (Supplementary  
563 Table S3).  
564

565 **Figure 5. Differentially expressed genes across clusters in males (A) and females (B)**  
566 **after developmental alcohol exposure.** Differentially expressed genes are listed on the top  
567 (columns) and cell clusters are represented by the rows. Upregulated genes are indicated with  
568 orange and downregulated genes are indicated with purple. Differentially expressed genes are  
569 filtered at  $|\log_2FC| > 0.25$  and a Bonferroni adjusted  $p$  value  $< 0.05$ . Differentially expressed  
570 genes that survive a threshold of  $|\log_2FC| > 1.0$  with a Bonferroni adjusted  $p$  value  $< 0.05$  are  
571 shown in Supplementary Figure S1.  
572

573 **Figure 6. Global interaction networks of differentially expressed gene products in males**  
574 **(A) and females (B) following developmental alcohol exposure.** Colors of the nodes  
575 correspond to the clusters in which expression of the gene is altered after growth on alcohol-  
576 supplemented medium.  
577

578 **Figure 7. Venn diagrams indicating the proportions of differentially regulated genes after**  
579 **exposure to alcohol during development or acute consumption of cocaine for males (A)**  
580 **and females (B).** Data for cocaine exposure are from ref 19. See also Supplementary Table 7.

581  
582 **Supplementary Materials**

583  
584 **Supplementary Figure S1. Differentially expressed genes across clusters in males (A)**  
585 **and females (B) after developmental alcohol exposure.** Differentially expressed genes are  
586 listed on the top (columns) and cell clusters are represented by the rows. Upregulated genes  
587 are indicated with orange and downregulated genes are indicated with purple. Differentially  
588 expressed genes are filtered at  $|\log_eFC| > 1.0$  and a Bonferroni adjusted  $p$  value  $< 0.05$ .

589  
590 **Supplementary Table S1. ANOVA tables for viability, ethanol sensitivity, and sleep and**  
591 **activity.**

592  
593 **Supplementary Table S2. Sequencing statistics.** F denotes females and M denotes males. C  
594 indicates control medium and E ethanol-supplemented medium. The numbers indicate  
595 replicates 1 and 2.

596  
597 **Supplementary Table S3. Genes used to annotate cell clusters.**

598  
599 **Supplementary Table S4. List of differentially expressed genes in each cluster in males.**  
600 Each sheet corresponds to the male analyses for the given cluster. "Avg\_diff" is conditionally  
601 formatted to indicate up- and down-regulation of expression in ethanol compared to regular food  
602 (red: up-regulated, green: down-regulated and yellow: no difference). p\_val: raw p-value from  
603 the differential expression analysis for the given gene in the corresponding cluster. avg\_diff: the  
604 difference in the  $\log(e)$  transformed average expression of the given gene in the corresponding  
605 cluster (sheet) between the two conditions (ethanol compared to regular food). Values above  
606 zero indicate up-regulation of expression due to developmental exposure to ethanol, and  
607 likewise, values below zero represent down-regulation of expression due to ethanol. p\_val\_adj:  
608 Bonferroni adjusted p-value. The DE matrix sheet is a summary of differentially expressed  
609 genes (columns) and the clusters in which they are differentially expressed (rows) with orange  
610 indicating upregulation and purple indicating downregulation at  $|\text{avg\_diff}|$  thresholds of 0.25 and  
611 1. The All DE per cluster sheet and the All DE sheet are summaries of all the differentially  
612 expressed genes.

613  
614 **Supplementary Table S5. List of differentially expressed genes in each cluster in females.**  
615 Each sheet corresponds to the female analyses for the given cluster. "Avg\_diff" is conditionally  
616 formatted to indicate up- and down-regulation of expression in ethanol compared to regular food  
617 (red: up-regulated, green: down-regulated and yellow: no difference). p\_val: raw p-value from  
618 the differential expression analysis for the given gene in the corresponding cluster. avg\_diff: the  
619 difference in the  $\log(e)$  transformed average expression of the given gene in the corresponding  
620 cluster (sheet) between the two conditions (ethanol compared to regular food). Values above  
621 zero indicate up-regulation of expression due to developmental exposure to ethanol, and  
622 likewise, values below zero represent down-regulation of expression due to ethanol. p\_val\_adj:  
623 Bonferroni adjusted p-value. The DE matrix sheet is a summary of differentially expressed  
624 genes (columns) and the clusters in which they are differentially expressed (rows) with orange  
625 indicating upregulation and purple indicating downregulation at  $|\text{avg\_diff}|$  thresholds of 0.25 and  
626 1. The All DE per cluster sheet and the All DE sheet are summaries of all the differentially  
627 expressed genes.

628

- 629 **Supplementary Table S6. Human orthologs of differentially expressed genes.**  
630
- 631 **Supplementary Table S7. Common differentially expressed genes upon developmental**  
632 **alcohol exposure and acute exposure to cocaine.**  
633
- 634 **Supplementary Table S8. Comparison of cell type-specific differentially expressed genes**  
635 **between developmental ethanol exposure and acute cocaine exposure.** Meta-comparison  
636 sheet contains the mapping of clusters and cell types between the two datasets as well as the  
637 methodology and summary of the comparisons. The rest of the sheets contain the list of  
638 statistically significantly differentially expressed genes, their Log<sub>e</sub> fold change values, the  
639 calculations of the comparisons between the two datasets for each cell type-category. The  
640 comparisons were done for each cell type-category separately for the male and female  
641 datasets.  
642
- 643 **Supplementary Table S9. Gene ontology analysis of differentially expressed genes**  
644 **identified both after developmental exposure to alcohol and acute intake of cocaine.**

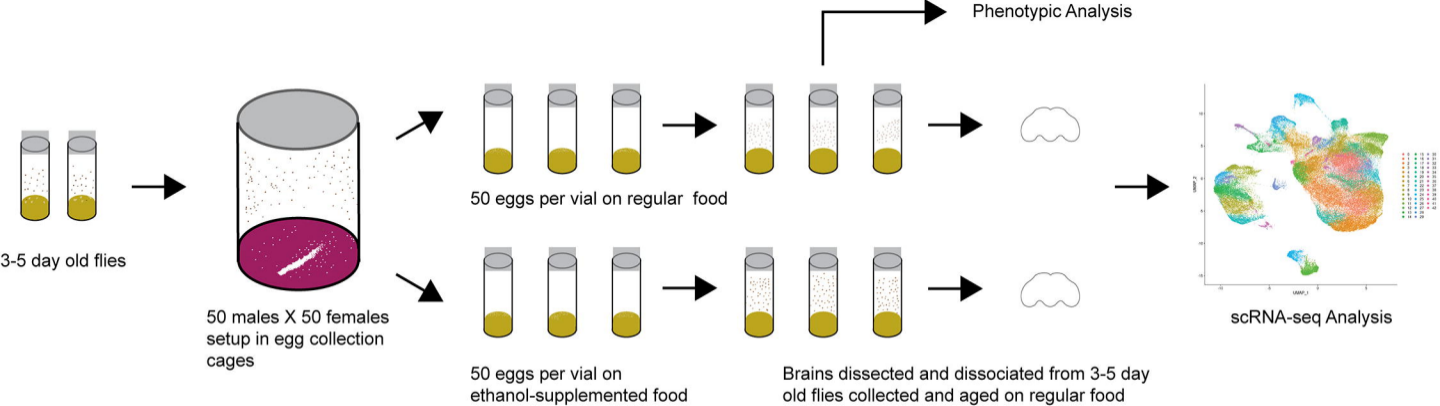

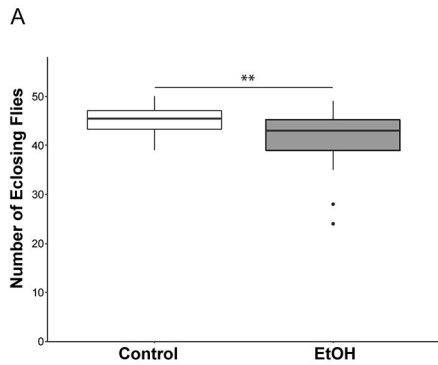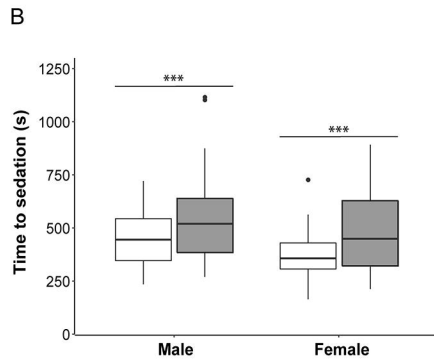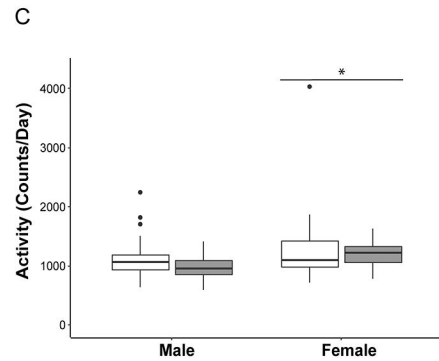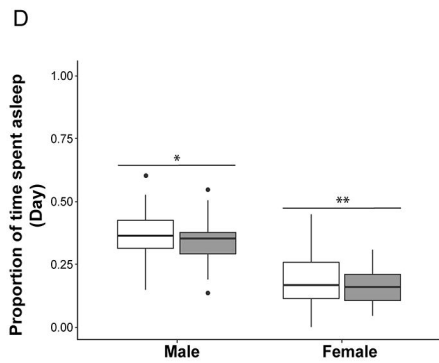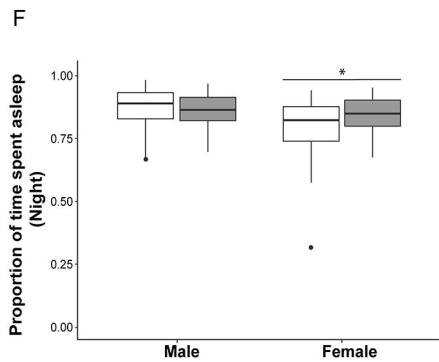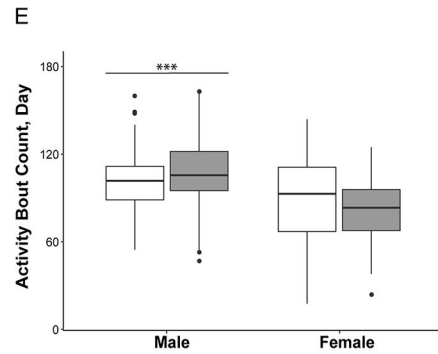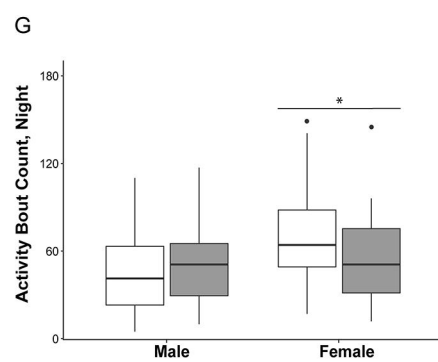



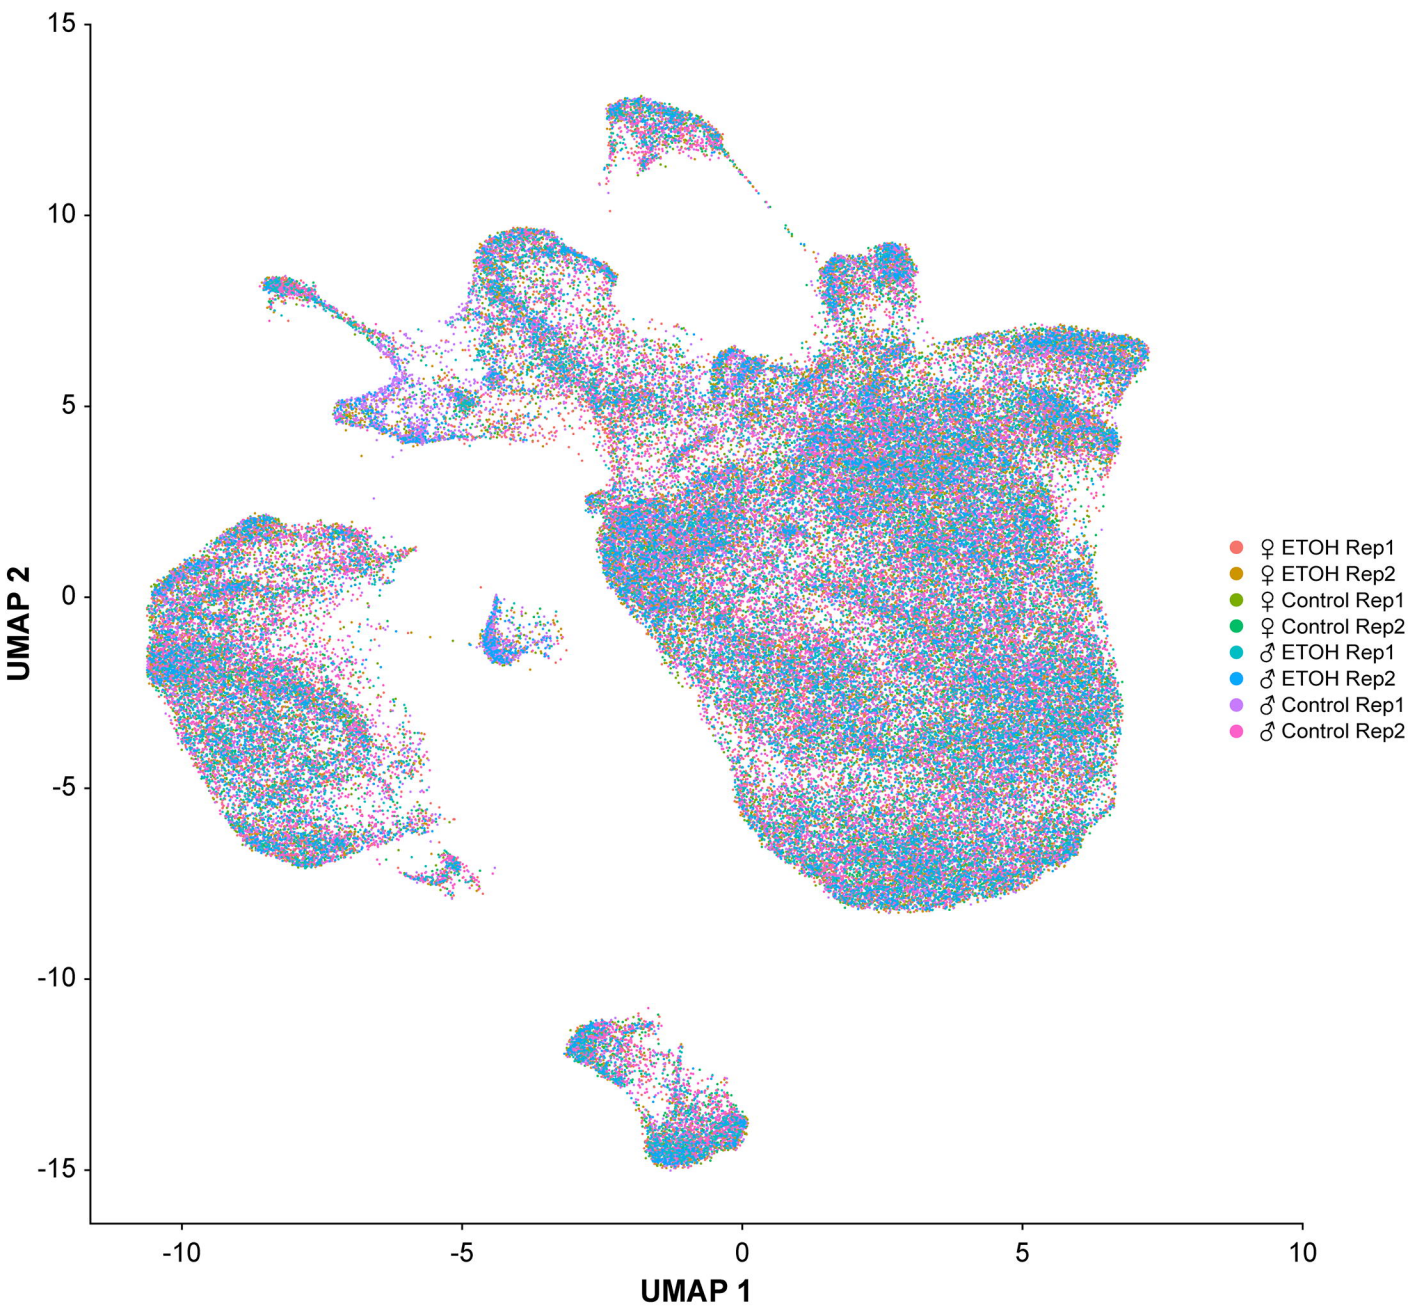

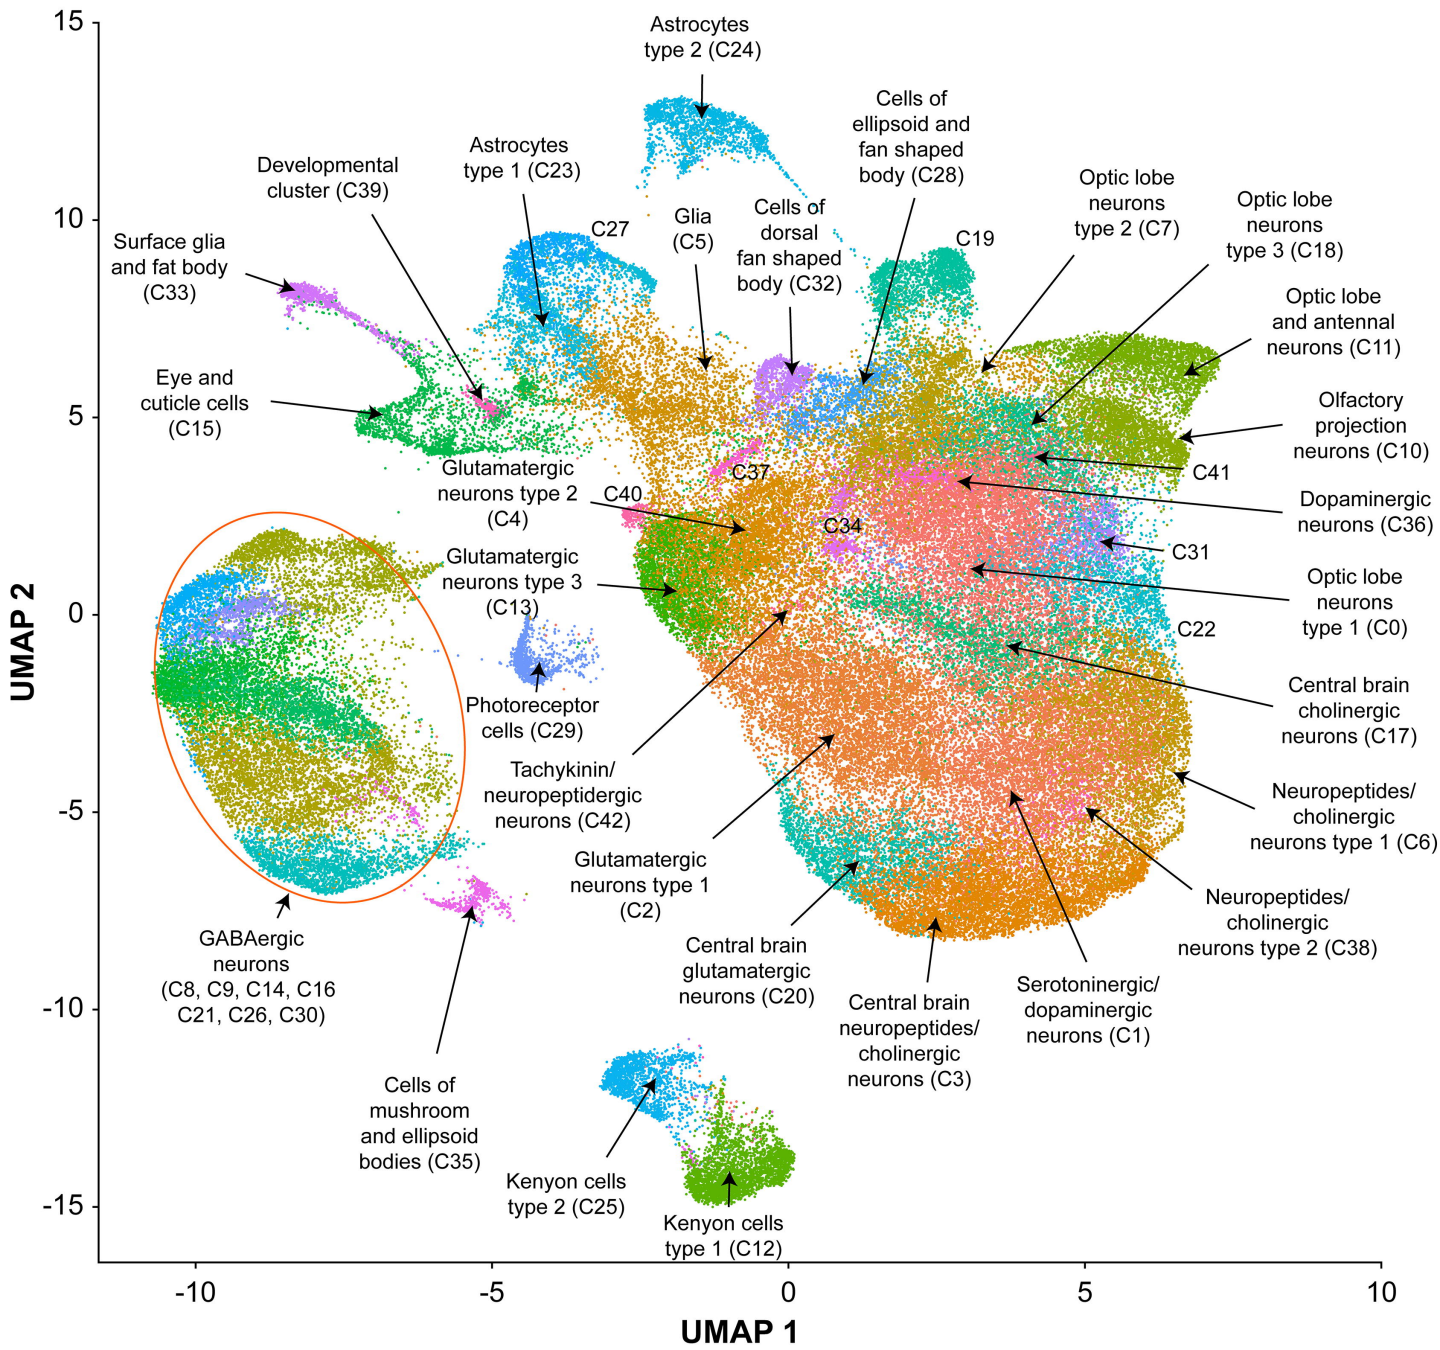



A

## Male Interaction Network

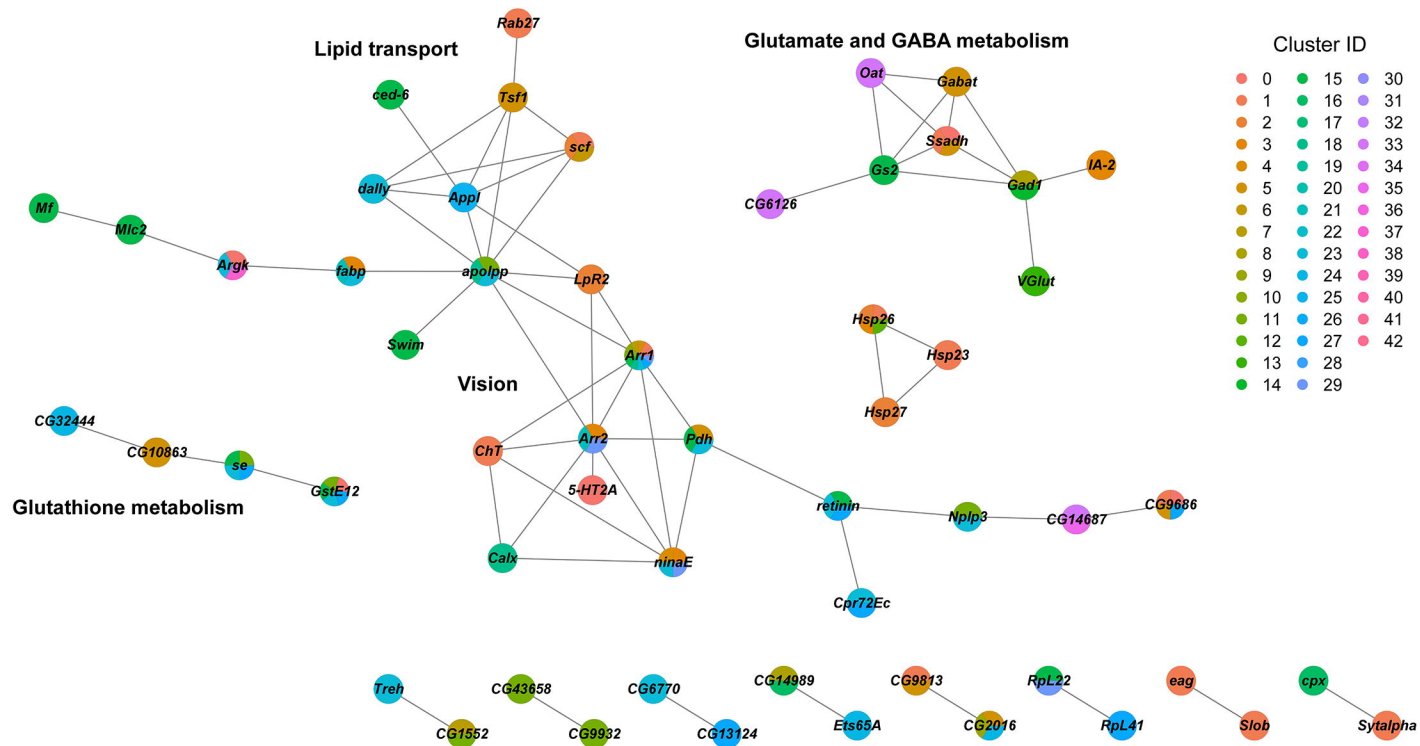

B

## Female Interaction Network

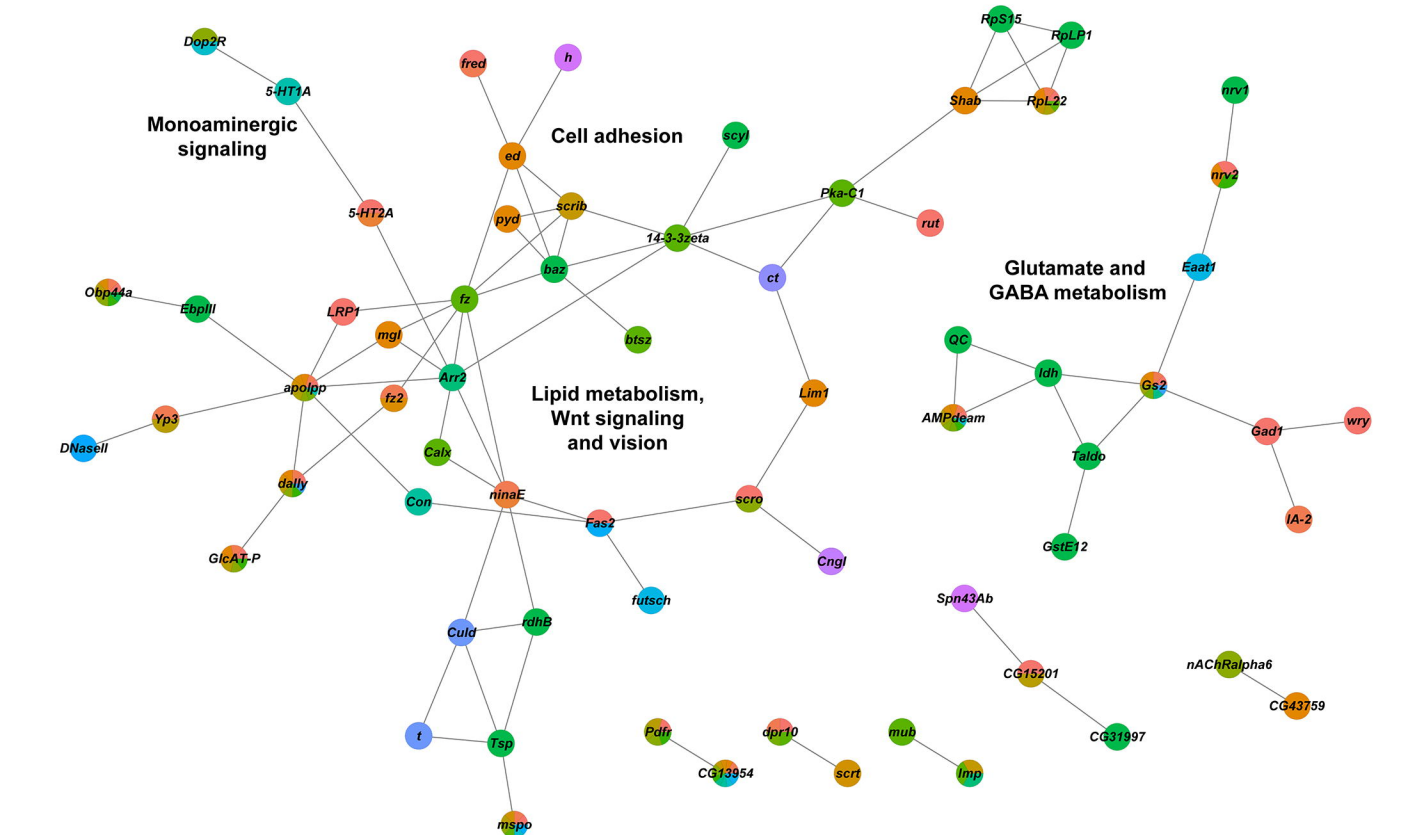

**A** Male dataset

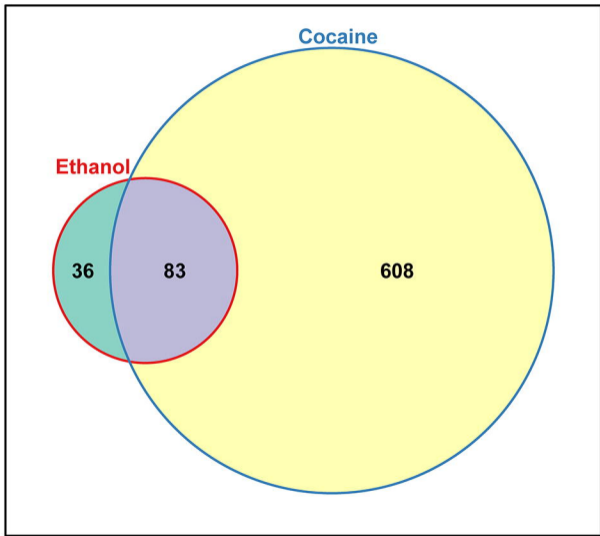

**B** Female dataset

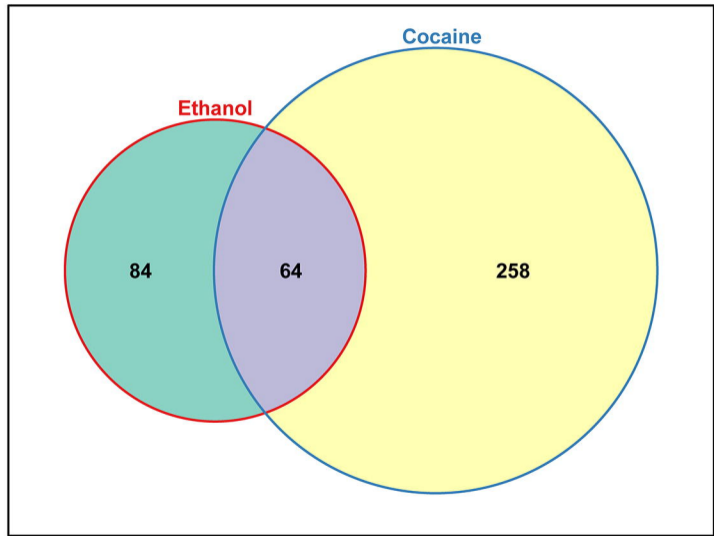

Source: https://www.biorxiv.org/content/10.1101/2021.04.22.440913v1.full.pdf
